# Supplementary material for: Proteomic Analysis of Hypoxia-Induced Senescence of Human Bone Marrow Mesenchymal Stem Cells
Source: Hindawi journal article supplement (doi:10.1155/2021/5555590), 2021-08-27
Supplement: f1 [file 5555590.f1.zip]

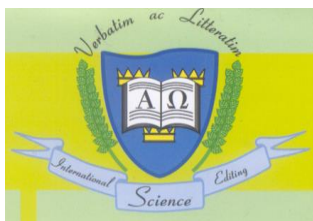

## **International Science Editing**

***[www.internationalscienceediting.com](http://www.internationalscienceediting.com)***

**DATE:** February 03, 2021

Compuscript Ltd  
T/A International Science Editing  
Bay K, Shannon Industrial Park West  
Shannon, Co Clare  
Ireland  
Phone +353 61 472818 Fax +353 61 472688

To whom it may concern,

The paper "Proteomics analysis of hypoxia-induced senescence of human bone marrow mesenchymal stem cells" by Liping Mai was edited by International Science Editing. We were asked not to edit the references. Please contact us if you would like to view the edited paper.

Kindest regards,

David Cushley.
